# Supplementary material for: Identification of direct T-box target genes in the developing zebrafish mesoderm
Source: Oxford University Press journal article supplement (doi:10.1242/dev.024703), 2009-01-22

## A Sequences of MOs

|      |     |     |     |     |     |     |     |     |   |                                  |
|------|-----|-----|-----|-----|-----|-----|-----|-----|---|----------------------------------|
| sptb | AGC | CTG | CAT | TAT | TTA | GCC | TTC | TCT | A | (targets nucleotides -16 to +9)  |
| sptc | CTG | GTG | TAT | CTA | AGT | GTT | TCA | GTT | C | (targets nucleotides -58 to -82) |
| ntla | GAC | TTG | AGG | CAG | GCA | TAT | TTC | CGA | T | (targets nucleotides -9 to +16)  |
| ntlb | CTT | GAG | ATA | AGT | CCG | ACG | ATC | CTA | C | (targets nucleotides -43 to -19) |

B Uninjected

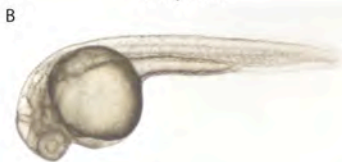

C *ntl* MO-injected

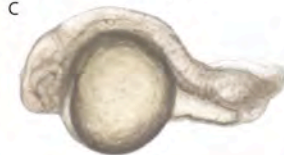

D *spt* MO-injected

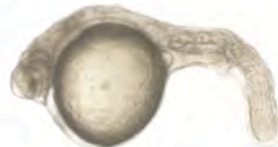

E *spt+ntl* MO-injected

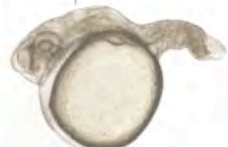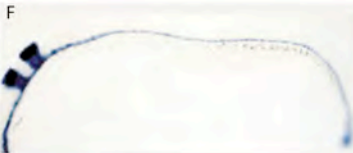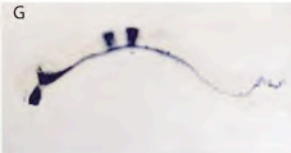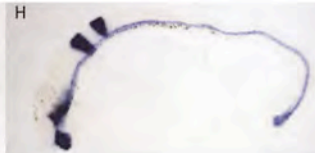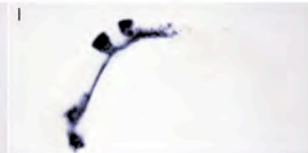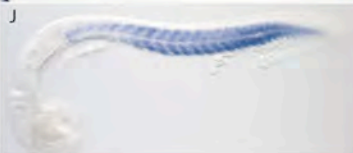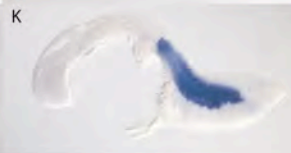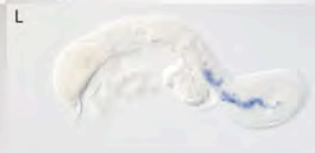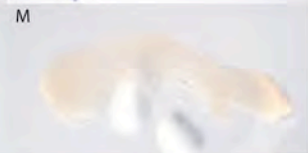

Supplement: dev024703-sup-024703-figs1.pdf [file dev024703-sup-024703-figs1.pdf]
