# Supplementary material for: Identification of direct T-box target genes in the developing zebrafish mesoderm
Source: Oxford University Press journal article supplement (doi:10.1242/dev.024703), 2009-01-22
Supplement: dev024703-sup-024703-figs6.pdf [file dev024703-sup-024703-figs6.pdf]

A

Zebrafish  
Tcf/Lef binding sites

ATCAAAG  
ATCAAAG  
ATGAAAG  
TTCAAAG  
TTCAAAG  
TTCAAAG  
TTCAAAG  
TTGAAAG  
TTCAAAG  
TACAAAG

*dharma/bozozok*  
(Ryu et al., 2001)

ATCAAAC  
AAGAAAG  
TTCAAAC  
AACAAAC  
AACAAAC  
TTCAAAG

*sp5-like*  
(Weidinger et al., 2005)

AACAAAG  
AACAAAC  
ATGAAAC

*nacre*  
(Dorsky et al., 2000)

ATCAAAG  
TTCAAAG

*tbx6*  
(Szeto and Kimelman,  
2004)

B

Suppressor of Hairless  
binding sites  
(Bailey and Posakony, 1995)

TGTGGGAA  
CGTGAGAA  
TGTGGGAA  
CGTGGGAA  
TGTGAGAA  
TGTGGGAA  
CGTGGGAA  
TGTGAGAA  
CGTGGGAA  
TGTGGGAA
