# Supplementary figures and images for: Identification of direct T-box target genes in the developing zebrafish mesoderm
Source: Oxford University Press journal article supplement (doi:10.1242/dev.024703), 2009-01-22

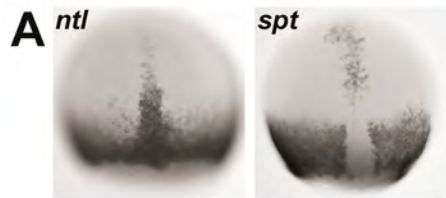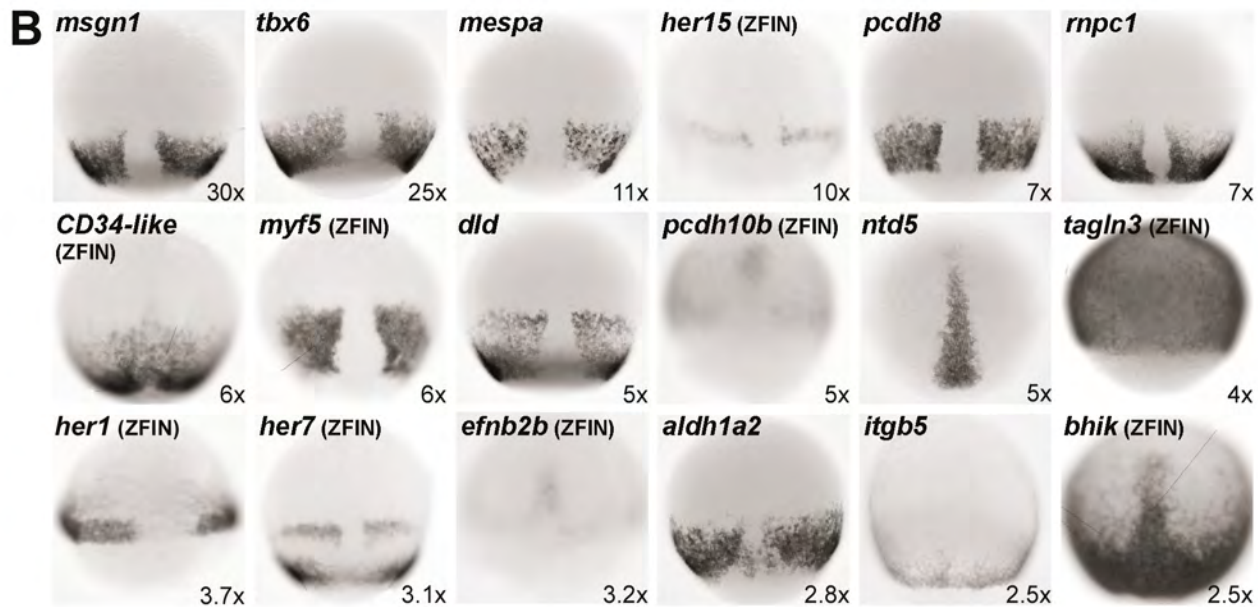

Supplement: dev024703-sup-024703-figs2.pdf [file dev024703-sup-024703-figs2.pdf]

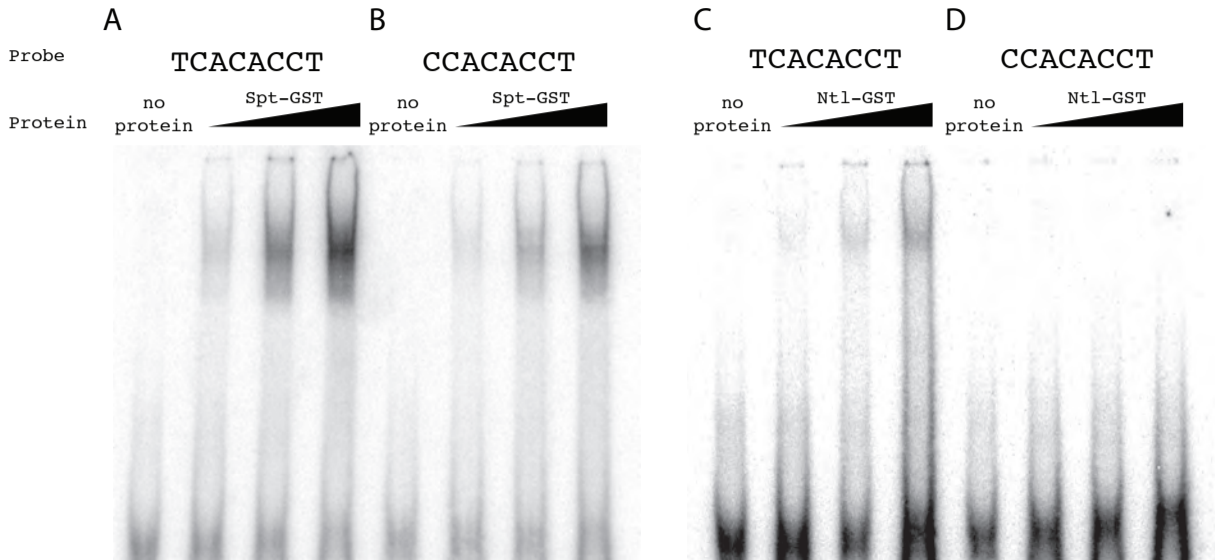

Supplement: dev024703-sup-024703-figs3.pdf [file dev024703-sup-024703-figs3.pdf]

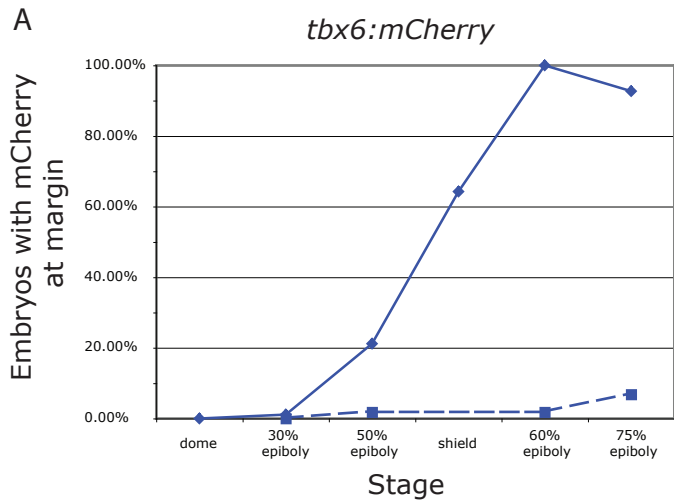

75% epiboly

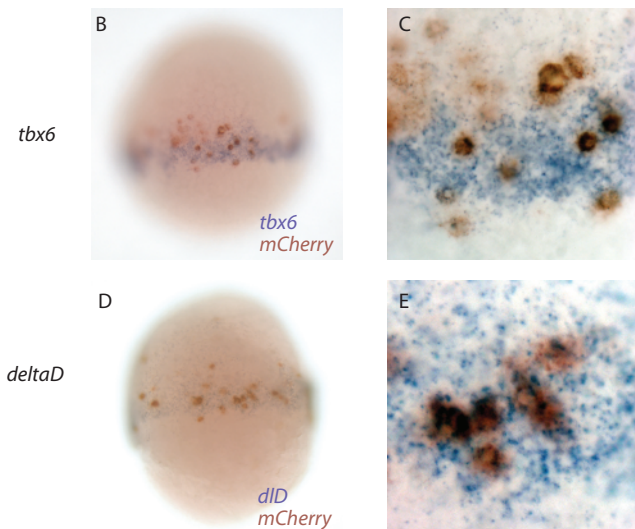

Supplement: dev024703-sup-024703-figs5.pdf [file dev024703-sup-024703-figs5.pdf]
